# Supplementary material for: The supportive care needs of people living with pulmonary fibrosis and their caregivers: a systematic review
Source: PubMed Central journal article supplement — Eur Respir Rev. 2020 Apr 29;29(156):190125. doi: 10.1183/16000617.0125-2019 (PMC9488682; doi:10.1183/16000617.0125-2019), 2020-04-29
Supplement: ERR-0125-2019_Supplementary_tables.pdf [file ERR-0125-2019_Supplementary_tables.pdf]

**Table S1. Search strategy**

|     |                                                                                                                                               |
|-----|-----------------------------------------------------------------------------------------------------------------------------------------------|
| 1.  | Care adj1 need\$.mp. or patient\$ adj1 need\$.mp. or need\$ adj1 assess\$.mp. or support\$ adj1 care adj1 need\$.mp. or healthcare need\$.mp. |
| 2.  | (Qualitative Research).mp                                                                                                                     |
| 3.  | (Patient Education).mp                                                                                                                        |
| 4.  | (Quality of life).mp                                                                                                                          |
| 5.  | or/1-4                                                                                                                                        |
| 6.  | exp Lung Diseases, Interstitial/                                                                                                              |
| 7.  | (interstitial\$ adj lung\$ adj disease\$).mp.                                                                                                 |
| 8.  | (interstitial\$ adj (fibros\$ or pneumonitis or pneumonia or pneumopathy)).mp.                                                                |
| 9.  | alveolitis.mp.                                                                                                                                |
| 10. | exp Bronchiolitis Obliterans/ or (bronchiolitis adj obliterans).mp.                                                                           |
| 11. | (goodpasture\$ adj syndrome\$).mp.                                                                                                            |
| 12. | granulomatosis.mp.                                                                                                                            |
| 13. | exp Histiocytosis/ or histiocytosis\$.mp.                                                                                                     |
| 14. | exp Pneumoconiosis/ or pneumoconiosis.mp. or pneumokoniosis.mp. or pneumoconiosis.mp.                                                         |
| 15. | bagassosis.mp.                                                                                                                                |
| 16. | (pulmonary\$ adj sarcoid\$).mp.                                                                                                               |
| 17. | (pulmonary\$ adj fibros\$).mp.                                                                                                                |
| 18. | (wegener\$ adj granuloma\$).mp.                                                                                                               |
| 19. | (lung\$ adj purpura).mp. (6)                                                                                                                  |
| 20. | ((bird\$ or farmer\$ or pigeon\$ or avian\$ or budgerigar\$) adj (lung\$ or disease\$)).mp.                                                   |
| 21. | (asbestosis or byssinosis or siderosis or silicosis or berylliosis or anthracosilicosis or silicotuberculosis).mp.                            |
| 22. | or/6-21                                                                                                                                       |
| 23. | 5 and 22                                                                                                                                      |
| 24. | Limit 23 to English language                                                                                                                  |

Databases were searched from inception (EMBASE 1947, CINAHL 1937, MEDLINE 1946 and PsychINFO 1967) to 10 July 2019.

**Table S2. Characteristics of included studies**

| Study             | Reference type  | Sample size                                  | Participant                                                   | Age years <sup>#</sup>                                | Disease characteristics <sup>¶</sup>                             | Baseline pulmonary function Mean % (range)                 | Intervention                       | Study design                                      | Country        | Recruitment context                                                     | Time of study |
|-------------------|-----------------|----------------------------------------------|---------------------------------------------------------------|-------------------------------------------------------|------------------------------------------------------------------|------------------------------------------------------------|------------------------------------|---------------------------------------------------|----------------|-------------------------------------------------------------------------|---------------|
| Albright 2016 (1) | Journal article | 471 responses to blog entries/ forum strings | Freely available to the public                                | Unclear                                               | Unclear                                                          | Unclear                                                    | Unclear                            | Qualitative<br>Narrative                          | United States  | Unclear                                                                 | 2013 - 2014   |
| Bajwah 2012 (2)   | Journal article | 18                                           | Patients (n=8); IC's (n=4); HCP's (n=6)                       | Age range, Patient: 56-81; IC: 41-63                  | Patients: IPF (n=7), NSIP (n=1) IC's: of patients with IPF (n=4) | TLCO % pred: range 30-39                                   | Unclear                            | Qualitative<br>Semi-structured in-depth interview | United Kingdom | Purposive sampling<br>Royal Brompton Hospital & King's College Hospital | 2010 - 2011   |
| Bajwah 2013 (3)   | Journal article | 18                                           | Patients (n=8); IC's (n=4; 3 spouse, 1 daughter); HCP's (n=6) | Age range, Patient: 56-81; IC: 41-63; HCP: 31-59      | IPF (n=7), NSIP (n=1) IC's: of patients with IPF (n=4)           | TLCO % pred: range 30-39                                   | Unclear                            | Qualitative<br>Semi-structured interview          | United Kingdom | Purposive sampling<br>Royal Brompton Hospital & King's College Hospital | 2010 - 2011   |
| Belkin 2014 (4)   | Journal article | 14                                           | IC's                                                          | Mean age, IC: 67 ± 7 (55-76); Patient: 69 ± 7 (57-78) | IPF Mean time since diagnosis: 4 ± 3 years (6 months-8 years)    | Mean FVC % : 66 ± 16 (47-99); Mean DLCO %: 33 ± 19 (13-76) | 24/7 O <sub>2</sub> therapy (n=10) | Qualitative<br>Semi-structured focus group        | United States  | Convenience sampling<br>National Jewish Health ILD Clinic               | 2012 - 2013   |

|                        |                        |                                                                         |                                                                                                                                                                                                                                                                                                    |                   |                                                                  |         |                          |                                                                                                                                                                              |                                                                                                           |                                                                         |         |
|------------------------|------------------------|-------------------------------------------------------------------------|----------------------------------------------------------------------------------------------------------------------------------------------------------------------------------------------------------------------------------------------------------------------------------------------------|-------------------|------------------------------------------------------------------|---------|--------------------------|------------------------------------------------------------------------------------------------------------------------------------------------------------------------------|-----------------------------------------------------------------------------------------------------------|-------------------------------------------------------------------------|---------|
| Belz<br>2018<br>(5)    | Conference<br>abstract | 40                                                                      | Patients                                                                                                                                                                                                                                                                                           | Median age:<br>72 | IPF<br>GAP index stage<br>1 (n=31)<br>GAP index stage<br>2 (n=9) | Unclear | Unclear                  | Quantitative<br><br>Survey to<br>choose 3 most<br>important<br>issues out of 15;<br>SF-36                                                                                    | Poland                                                                                                    | Unclear<br><br>Patients<br>qualified for<br>treatment were<br>recruited | Unclear |
| Bonella<br>2016<br>(6) | Journal<br>article     | 12 PGs<br>interviewed<br><br>16 attended<br>Working<br>Group<br>meeting | PGs:<br>Patients (n=4);<br>Spouse/child<br>(n=3);<br>Unspecified<br>participants<br>(n=5)<br><br>Working Group<br>meeting<br>participants:<br>Patients (n=4);<br>Spouse/child<br>(n=3);<br>Unspecified<br>participants<br>(n=4)<br>IPF specialist<br>(n=5; 4<br>physicians, 1<br>specialist nurse) | Unclear           | IPF (n=6), non-<br>IPF lung fibrosis<br>(n=1)                    | Unclear | Lung transplant<br>(n=2) | Qualitative<br><br>Individual<br>telephone<br>interview using<br>questionnaire<br>developed by<br>patient<br>advocacy<br>groups and<br>external<br>healthcare<br>consultancy | Europe:<br>Austria,<br>Belgium,<br>France,<br>Germany,<br>Ireland,<br>Italy, Spain,<br>UK,<br>Netherlands | Patient<br>advocacy<br>groups                                           | 2014    |

|                  |                 |                                     |                                                                                                                                       |                  |                                                                                                                     |                                                                   |                                                                                                                                                        |                                                                                                               |               |                                                                                        |             |
|------------------|-----------------|-------------------------------------|---------------------------------------------------------------------------------------------------------------------------------------|------------------|---------------------------------------------------------------------------------------------------------------------|-------------------------------------------------------------------|--------------------------------------------------------------------------------------------------------------------------------------------------------|---------------------------------------------------------------------------------------------------------------|---------------|----------------------------------------------------------------------------------------|-------------|
| Bridges 2014 (7) | Journal article | 20                                  | Patients, IC's (spouses/adult children), and advocates (n=7); Providers and clinical researchers (n=8); Industry/policy experts (n=5) | Unclear          | IPF                                                                                                                 | Unclear                                                           | Unclear                                                                                                                                                | Qualitative<br>Semi-structure interview (in person and telephone)                                             | United States | Purposive and snowball sampling<br><br>Partnership with national advocacy organization | Unclear     |
| Burnett 2019 (8) | Journal article | 100                                 | Patients                                                                                                                              | Age range: 57-90 | IPF                                                                                                                 | Median FVC % pred: 77 (46-106);<br>Median DLCO % pred: 54 (21-95) | Anti-fibrotic therapy (n=46);<br>Had ceased anti-fibrotic therapy (n=7);<br>Never been offered anti-fibrotic therapy (n=39);<br>Could not report (n=8) | Qualitative<br>Semi-structured interview (telephone)<br><br>Grounded theory                                   | Australia     | The Australian IPF Registry                                                            | Unclear     |
| Collard 2007 (9) | Journal article | 1448 (79.0% respond rate to survey) | Patients (n=1251);<br>IC's responding on behalf of patients (n=197)                                                                   | Median age: 65   | IPF<br>Year diagnosed:<br>Prior to 2000 (23.9%);<br>2000 - 2001 (24.8%);<br>2002 - 2003 (39.9%);<br>In 2004 (10.2%) | Unclear                                                           | Unclear                                                                                                                                                | Quantitative<br><br>Survey - 52 defined-choice and open-ended questions regarding PF diagnosis and management | United States | The coalition for PF website, sponsored seminars and institutional partners            | 2003 - 2004 |

|                      |                     |                                                                             |                                                    |                |                                                           |                                                                        |                                                                                                                                                                                                              |                                                                          |                           |                                                 |             |
|----------------------|---------------------|-----------------------------------------------------------------------------|----------------------------------------------------|----------------|-----------------------------------------------------------|------------------------------------------------------------------------|--------------------------------------------------------------------------------------------------------------------------------------------------------------------------------------------------------------|--------------------------------------------------------------------------|---------------------------|-------------------------------------------------|-------------|
| Conoscenti 2013 (10) | Conference abstract | 61                                                                          | Patients                                           | Unclear        | IPF                                                       | Unclear                                                                | Unclear                                                                                                                                                                                                      | Qualitative<br>In person interview<br>Grounded theory                    | United States             | Unclear                                         | Unclear     |
| Duck 2015 (11)       | Journal article     | 823 follow-up phone calls (representing 239 patients); 44 completed surveys | Patients                                           | Unclear        | IPF Patients diagnosed in the previous 12 months of study | Unclear                                                                | Pirfenidone<br>IPF Care Patient Support Program                                                                                                                                                              | Quantitative<br>Posted evaluation questionnaire                          | United Kingdom<br>Austria | IPF Care Patient Support Program                | 2013 - 2014 |
| Duck 2015 (12)       | Journal article     | 23                                                                          | Patients (n=17); IC's (n=6, 5 spouses; 1 daughter) | Median age: 67 | IPF; Moderate to advanced                                 | Mean FVC % pred: 68 (44-104; n=17); Mean DLCO % pred: 43 (23-67; n=13) | Long-term O <sub>2</sub> therapy and ambulatory O <sub>2</sub> (n=10); Ambulatory O <sub>2</sub> only (n=2); Not using O <sub>2</sub> (n=5);<br><br>Lung transplant waiting list (n=3); Clinical trial (n=3) | Qualitative<br>Individual or joint semi-structured interview (in person) | United Kingdom            | Regional respiratory and lung transplant centre | 2007 - 2012 |

|                        |                        |         |                                      |                                    |                                                                                                      |         |                                                                                                             |                                                                                                                             |                                                       |                                                                                                                       |         |
|------------------------|------------------------|---------|--------------------------------------|------------------------------------|------------------------------------------------------------------------------------------------------|---------|-------------------------------------------------------------------------------------------------------------|-----------------------------------------------------------------------------------------------------------------------------|-------------------------------------------------------|-----------------------------------------------------------------------------------------------------------------------|---------|
| Gillon<br>2016<br>(13) | Conference<br>abstract | Unclear | Patients;<br>ILD staff               | Unclear                            | IPF                                                                                                  | Unclear | Specialist<br>palliative care                                                                               | Mixed method<br><br>Staff confidence<br>scales;<br>Patient's unmet<br>needs                                                 | United<br>Kingdom                                     | Unclear                                                                                                               | Unclear |
| Giot<br>2013<br>(14)   | Journal<br>article     | 63      | Patients (n=45);<br>IC's (n=18)      | Median age:<br>67                  | IPF -<br>progressive<br>(16%)<br><br>Year diagnosed:<br>Since 2000<br>(16%);<br>2006 - 2010<br>(60%) | Unclear | Continuous O <sub>2</sub><br>therapy (40%)                                                                  | Qualitative<br><br>Individual or<br>joint in-depth<br>structured<br>interview (in<br>person);<br>Pilot test online<br>forum | Europe:<br>Germany,<br>France,<br>Italy, Spain,<br>UK | Unclear                                                                                                               | 2010    |
| Graney<br>2017<br>(15) | Journal<br>article     | 20      | IC's (16<br>spouses , 4<br>children) | Mean age:<br>62.2 ± 9.7<br>(44–76) | PF                                                                                                   | Unclear | O <sub>2</sub> therapy for ><br>8 months;<br><br>Mean duration<br>of O <sub>2</sub> use: 3.9<br>years ± 3.0 | Qualitative<br><br>Semi-structured<br>telephone<br>interview<br><br>Grounded<br>theory                                      | United<br>States                                      | Convenience<br>sampling<br><br>National Jewish<br>Health ILD<br>Clinic/<br>Participation<br>Program for PF<br>website | Unclear |

|                   |                     |    |                                                                                                                                  |                              |                                                                                                                     |                                                                                            |                             |                                                                                                                                                                                           |                |                                                                          |             |
|-------------------|---------------------|----|----------------------------------------------------------------------------------------------------------------------------------|------------------------------|---------------------------------------------------------------------------------------------------------------------|--------------------------------------------------------------------------------------------|-----------------------------|-------------------------------------------------------------------------------------------------------------------------------------------------------------------------------------------|----------------|--------------------------------------------------------------------------|-------------|
| Graney 2017 (16)  | Journal article     | 5  | Patients                                                                                                                         | Mean age: 64.6 ± 9.4 (53–76) | IPF (n=4), chronic HP (n=1)<br><br>Median time since diagnosis: 2 years (2-15)                                      | Mean FVC % pred: 52.2 ± 14.8 (40-77)                                                       | O <sub>2</sub> therapy (0%) | Mixed method<br><br>Longitudinal (at 4 time points from enrolment to 9-12 months after initiation of O <sub>2</sub> therapy)<br><br>Qualitative<br>Serial structured telephone interviews | United States  | Unclear                                                                  | 2013 - 2015 |
| Holland 2015 (17) | Journal article     | 32 | Patients (n=18); Clinicians (n=14; 5 nurses, 4 physicians, 3 physiotherapists, 1 respiratory therapist, 1 exercise physiologist) | Age range, Patient: 49-81    | IPF (n=9), NSIP (n=3), pulmonary lymphangio-myomatosis (n=1), HP (n=3), sarcoidosis (n=1), unclassifiable ILD (n=1) | FVC % pred, range: 31-100; T <sub>LCO</sub> % pred, range: 28-94; 6MWD (m), range: 270-663 | Previous PR program (50%)   | Qualitative<br><br>Semi-structured interview                                                                                                                                              | Australia      | Purposive sampling<br><br>Tertiary hospital with a specialist ILD clinic | Unclear     |
| Killin 2010 (18)  | Conference abstract | 24 | Patients IC's                                                                                                                    | Unclear                      | IPF; A range of severity                                                                                            | Unclear                                                                                    | Unclear                     | Quantitative<br><br>Cross sectional<br><br>Structured interview with questionnaires: WHOQOL 100 (others unclear)                                                                          | United Kingdom | Consecutive patients from ILD clinic                                     | Unclear     |

|                         |                    |                                                                    |                                                                                                                                                                                                                   |                                     |                                                        |                                                                                             |                                                                                                                                                                                                                                                                                                          |                                                                                    |                                                                      |                                                                                                                                                                                     |                |
|-------------------------|--------------------|--------------------------------------------------------------------|-------------------------------------------------------------------------------------------------------------------------------------------------------------------------------------------------------------------|-------------------------------------|--------------------------------------------------------|---------------------------------------------------------------------------------------------|----------------------------------------------------------------------------------------------------------------------------------------------------------------------------------------------------------------------------------------------------------------------------------------------------------|------------------------------------------------------------------------------------|----------------------------------------------------------------------|-------------------------------------------------------------------------------------------------------------------------------------------------------------------------------------|----------------|
| Lindell<br>2017<br>(19) | Journal<br>article | 13                                                                 | Patients (n=5);<br>IC's of current<br>patients (n=5);<br>IC's of decedent<br>patients (n=3;<br>75% spouses,<br>25% daughters)                                                                                     | Mean age,<br>Patient:<br>71.4 ± 7.2 | IPF<br>Time since<br>diagnosis:<br>range 1-11<br>years | Most recent<br>FVC % pred,<br>range: 65-125;<br>Most recent<br>DLCO % pred,<br>range: 26-70 | O <sub>2</sub> therapy,<br>Yes (n=3);<br>No (n=2)                                                                                                                                                                                                                                                        | Qualitative<br><br>Focus group                                                     | United<br>States                                                     | Convenience<br>sampling<br><br>IPF clinic and<br>support group<br>at the Dorothy<br>P. & Richard P.<br>Simmons Center<br>for ILD<br>(University of<br>Pittsburgh<br>Medical Center) | 2014 -<br>2015 |
| Maher<br>2018<br>(20)   | Journal<br>article | 347<br>completed<br>survey<br><br>129<br>participated<br>interview | Survey:<br>Patients (n=60);<br>Pulmonologists<br>(n=287)<br><br>Interview:<br>Patients (n=68)<br>IC's were<br>allowed for<br>interview<br>participation but<br>number is<br>unclear);<br>Pulmonologists<br>(n=61) | Mean age:<br>64.6 ± 9.0             | IPF                                                    | Unclear                                                                                     | Pirfenidone<br>(73%, n=44/60);<br>Nintedanib<br>(18%, n=11/60);<br>Both treatments<br>sequentially<br>(Pirfenidone<br>then Nintedanib;<br>8%, n=5/60)<br><br>At the time of<br>survey<br>completion,<br>patients<br>receiving<br>treatment (77%,<br>n=(46/60);<br>stopped<br>treatment (22%,<br>n=13/60) | Mixed method<br><br>Interview (in<br>person and<br>telephone)<br><br>Online survey | Canada,<br>France,<br>Germany,<br>Italy, Spain,<br>United<br>Kingdom | Patients<br>recruited via<br>physician<br>referrals,<br>patient groups,<br>or market<br>research<br>panels . HCPs<br>recruited from<br>market research<br>panels.                   | 2016           |



|                           |                        |    |                                     |                                 |                                                                                               |                                                              |                                                                                                                                                                                                                                                                                                                        |                                                                                                                                            |                             |                                                                                                                                                          |         |
|---------------------------|------------------------|----|-------------------------------------|---------------------------------|-----------------------------------------------------------------------------------------------|--------------------------------------------------------------|------------------------------------------------------------------------------------------------------------------------------------------------------------------------------------------------------------------------------------------------------------------------------------------------------------------------|--------------------------------------------------------------------------------------------------------------------------------------------|-----------------------------|----------------------------------------------------------------------------------------------------------------------------------------------------------|---------|
| McLean<br>2018<br>(21)    | Conference<br>abstract | 38 | Patients                            | Mean age:<br>66 ± 13            | IPF (n=12,<br>31.6%), CTD-ILD<br>(n=7, 18.4%),<br>uncertain of IL<br>diagnosis<br>(n=14, 37%) | Unclear                                                      | Unclear                                                                                                                                                                                                                                                                                                                | Mixed method<br><br>Survey<br>collecting both<br>quantitative and<br>qualitative data                                                      | Australia                   | Sub-specialist<br>multidisciplinary<br>ILD clinic within<br>the Royal Prince<br>Alfred Hospital<br>(NSW)                                                 | Unclear |
| Morrisset<br>2016<br>(22) | Journal<br>article     | 34 | Patients (n=24)<br>ILD HCP's (n=10) | Mean age,<br>Patient: 67 ±<br>9 | IPF (n=12), HP<br>(n=4), CTD-ILD<br>(n=5), others<br>(n=3)                                    | Mean FVC %<br>pred: 70 ± 20;<br>Mean DLCO %<br>pred: 52 ± 10 | Long-term O <sub>2</sub><br>therapy (n=10);<br>Previous<br>participation in<br>PR (n=14);<br>Previous<br>participation in<br>support group<br>(n=15);<br>Current drug<br>therapy:<br>Prednisone<br>(n=2),<br>Azathioprine<br>(n=1),<br>Mycophenolate<br>mofetil (n=5),<br>Nintedanib<br>(n=2),<br>Pirfenidone<br>(n=8) | Qualitative<br><br>Focus group<br>(with patients)<br>Semi-structured<br>individual<br>interviews (with<br>HCP's)<br><br>Grounded<br>theory | United<br>States;<br>Canada | Purposive<br>sampling<br><br>ILD clinics<br>(University of<br>California San<br>Francisco/<br>Centre<br>Hospitalier de<br>l'Universit e de<br>Montr eal) | 2015    |

|                           |                    |     |                                                  |                                                                                  |     |                                                                                                                                     |                                                                     |                                                                                              |                  |                                                                                                                                                                                                                        |      |
|---------------------------|--------------------|-----|--------------------------------------------------|----------------------------------------------------------------------------------|-----|-------------------------------------------------------------------------------------------------------------------------------------|---------------------------------------------------------------------|----------------------------------------------------------------------------------------------|------------------|------------------------------------------------------------------------------------------------------------------------------------------------------------------------------------------------------------------------|------|
| Overgaard<br>2016<br>(23) | Journal<br>article | 49  | Patients (n=25);<br>IC's (n=24)                  | Mean age,<br>Patient:<br>71.1 (50-91)                                            | IPF | Mean FEV <sub>1</sub> %<br>pred: 85.5<br>(30-123);<br>Mean FVC %<br>pred: 83.1<br>(31-120);<br>Mean DLCO %<br>pred: 50.5<br>(23-76) | Long-term O <sub>2</sub><br>therapy (n=7);<br>Pirfenidone<br>(n=15) | Qualitative<br><br>In person<br>interview                                                    | Denmark          | Convenience<br>sampling<br><br>Specialist clinics<br>at two<br>University<br>hospitals                                                                                                                                 | 2014 |
| Pooler<br>2018<br>(24)    | Journal<br>article | 8   | Bereaved IC's of<br>> 3 months                   | Patients in<br>their,<br>50's (n=2);<br>60's (n=3);<br>70's (n=2);<br>80's (n=1) | IPF | Unclear                                                                                                                             | Unclear                                                             | Qualitative<br><br>Open-ended<br>interview (in<br>person and<br>telephone)                   | Canada           | Purposive<br>sampling<br><br>Multidisciplinary<br>ILD clinic via<br>intermediary<br>and third person<br>contact                                                                                                        | 2016 |
| Ramadurai<br>2019<br>(25) | Journal<br>article | 345 | Patients (n=160)<br>IC's (n=29)<br>HCP's (n=156) | Unclear                                                                          | IPF | Unclear                                                                                                                             | Unclear                                                             | Mixed method<br><br>Online survey<br>collecting both<br>quantitative and<br>qualitative data | United<br>States | Convenience<br>and purposive<br>sampling<br><br>Research<br>contact registry,<br>targeted social<br>media outreach,<br>IPF support<br>groups, and<br>National Jewish<br>Health HCP<br>education<br>program<br>database | 2017 |

|                     |                 |    |                                |                                                                                                                                                                      |                                                                                                             |                                                                                                                                                                                                                                                                                |                                                                                                    |                                                                             |                                |                                                                                   |             |
|---------------------|-----------------|----|--------------------------------|----------------------------------------------------------------------------------------------------------------------------------------------------------------------|-------------------------------------------------------------------------------------------------------------|--------------------------------------------------------------------------------------------------------------------------------------------------------------------------------------------------------------------------------------------------------------------------------|----------------------------------------------------------------------------------------------------|-----------------------------------------------------------------------------|--------------------------------|-----------------------------------------------------------------------------------|-------------|
| Ramadurai 2018 (26) | Journal article | 17 | Patients (n=13)<br>IC's (n=4)  | Mean age, Patient: 68.1 ± 7.2; Caregiver: 63.3 ± 7.7                                                                                                                 | IPF<br>Mean disease duration: 5.7 ± 4.4 years                                                               | Unclear                                                                                                                                                                                                                                                                        | Not using supplemental O <sub>2</sub> (n=1); Use on exertion only (n=5); Continuous use (n=7)      | Qualitative<br>Focus group                                                  | United States                  | National Jewish Health ILD Programme                                              | 2016        |
| Russell 2016 (27)   | Journal article | 45 | Patients                       | Mean age: 68.5                                                                                                                                                       | IPF<br>Mean time since diagnosis: 3.5 years                                                                 | Unclear                                                                                                                                                                                                                                                                        | Pirfenidone (100%); O <sub>2</sub> therapy as needed (55%); Continual O <sub>2</sub> therapy (35%) | Qualitative<br>Semi-structured interview (in person)                        | United Kingdom; Germany; Italy | Patient support groups (UK), specialist centres (Italy), advocacy group (Germany) | 2012        |
| Sampson 2015 (28)   | Journal article | 48 | Patients (n=27)<br>IC's (n=21) | Mean age, Extensive progressive group: 69.5 (56-77); Limited progressive group: 72.6 (59-81); Extensive stable group: 71 (69-82); Limited stable group: 75.1 (66-87) | IPF<br>Extensive progressive (n=3); Limited progressive (n=5); Extensive stable (n=6); Limited stable (n=9) | Limited: FVC > 50 %; and T <sub>LCO</sub> > 40 %; Extensive: FVC < 50 %, or T <sub>LCO</sub> < 40 %; Stable: decline of < 10 % in FVC, or < 15 % in T <sub>LCO</sub> in last 12 months; Progressive: decline of > 10 % in FVC, or > 15 % in T <sub>LCO</sub> in last 12 months | Pirfenidone (0%); Lung transplant (n=2); O <sub>2</sub> therapy (n=5)                              | Mixed method<br>Cross-sectional<br>Qualitative<br>Semi-structured interview | United Kingdom                 | Two UK specialist ILD clinics                                                     | 2012 - 2014 |

|                      |                 |                                                        |                                                                                    |                                           |                                                                                                                                               |         |                                                                                                                                                                    |                                                                                                                                                                                                  |                                           |                                                                                |         |
|----------------------|-----------------|--------------------------------------------------------|------------------------------------------------------------------------------------|-------------------------------------------|-----------------------------------------------------------------------------------------------------------------------------------------------|---------|--------------------------------------------------------------------------------------------------------------------------------------------------------------------|--------------------------------------------------------------------------------------------------------------------------------------------------------------------------------------------------|-------------------------------------------|--------------------------------------------------------------------------------|---------|
| Senanayake 2018 (29) | Journal article | 10                                                     | Patients (2 spouses accompanied patient at interview)                              | Mean age: 70.5 ± 10.4<br>Age range: 53-81 | IPF<br>Disease onset range: 7 months–10 years<br>Onset > 1 year (n=5);<br>Onset 3–5 years (n=2);<br>Onset 8–10 years (n=3)                    | Unclear | O <sub>2</sub> use during interview (n=1);<br>O <sub>2</sub> use during strenuous activities (n=2)                                                                 | Qualitative<br>Semi-structured interview (in person)<br><br>Grounded theory                                                                                                                      | United Kingdom                            | Purposive sampling<br><br>Patients support group                               | Unclear |
| Schoenheit 2011 (30) | Journal article | 45                                                     | Patients (25% from each country);<br>IC's participated in 40% of the 45 interviews | Median age: 67                            | IPF<br>Median time since diagnosis: 1.5 years (< 1 week-12 years)                                                                             | Unclear | O <sub>2</sub> therapy, None (44%);<br>Continuous (40%);<br>Non-continuous (16%)                                                                                   | Qualitative<br>In-depth interview (in person)                                                                                                                                                    | Europe: Germany, France, Italy, Spain, UK | Unclear                                                                        | Unclear |
| Shah 2018 (31)       | Journal article | 37 completed survey<br><br>15 participated focus group | IC's                                                                               | Mean age: 66 ± 13                         | Non specific interstitial pneumonitis (6%, n=2), sarcoidosis (3%, n=1), other (9%, n=3)<br><br>Median duration of disease (IQR): 1 year (0,4) | Unclear | Not requiring supplemental O <sub>2</sub> (30%);<br>Using supplemental O <sub>2</sub> with exertion (27%);<br>Using supplemental O <sub>2</sub> all the time (43%) | Mixed method<br>Focus group<br><br>Grounded theory<br><br>Paper form and online surveys including SF-36, a revised Zarit Burden Interview questionnaire and the Connor-Davidson resilience scale | United States                             | Convenience sampling<br><br>University of California, San Francisco ILD clinic | Unclear |

|                     |                     |     |                                                                                           |                        |                                                                                                                                                                                                       |         |                                                                                                                     |                                                                                      |                       |                                                                                                                                                |             |
|---------------------|---------------------|-----|-------------------------------------------------------------------------------------------|------------------------|-------------------------------------------------------------------------------------------------------------------------------------------------------------------------------------------------------|---------|---------------------------------------------------------------------------------------------------------------------|--------------------------------------------------------------------------------------|-----------------------|------------------------------------------------------------------------------------------------------------------------------------------------|-------------|
| Swigris 2005 (32)   | Journal article     | 20  | Patients                                                                                  | Median age: 67 (44-82) | IPF Median time since diagnosis: 1.8 years (0.67-11 years)                                                                                                                                            | Unclear | Medication for IPF (n=19); O <sub>2</sub> therapy, None (n=6); Use with exertion and sleep (n=4); Continuous (n=10) | Qualitative Focus group Interview                                                    | United States         | The general pulmonary and ILD Clinics (Stanford University)                                                                                    | 2003 - 2004 |
| van Manen 2017 (33) | Journal article     | 329 | Netherlands (n=278; 134 patients, 144 partners); Germany (n=51; 27 patients, 24 partners) | Unclear                | Netherlands, IPF (70%, n=88), CTD-PF (11%, n=14), exposure related (11%, n=14), unknown (8%, n=10);<br><br>Germany, IPF (80%, n=20), CTD-PF (8%, n=2), exposure related (12%, n=3), unknown (0%, n=0) | Unclear | Unclear                                                                                                             | Quantitative Interactive voting system (Netherlands) Questionnaire (Germany): GAD-SI | Netherlands ; Germany | PF information meetings at two tertiary ILD centres (the Erasmus University Medical Center & the Thoraxklinik, Heidelberg University Hospital) | 2013 - 2015 |
| Wall 2013 (34)      | Conference abstract | 97  | Patients                                                                                  | Median age: 69 (47-86) | IPF (81%, n=79), NSIP (19%, n=18), severe lung function defects (TLCO <40%; 39%, n=38)                                                                                                                | Unclear | Unclear                                                                                                             | Quantitative Cross-sectional Questionnaire: SPARC                                    | United Kingdom        | Specialist clinics                                                                                                                             | Unclear     |

|                        |                        |    |                                             |         |     |         |                                                                                                    |                                                     |                   |             |         |
|------------------------|------------------------|----|---------------------------------------------|---------|-----|---------|----------------------------------------------------------------------------------------------------|-----------------------------------------------------|-------------------|-------------|---------|
| Wright<br>2016<br>(35) | Conference<br>abstract | 57 | Patients (n=27)<br>Family members<br>(n=25) | Unclear | IPF | Unclear | Workshop led by<br>clinical<br>psychologist and<br>palliative care<br>clinical nurse<br>specialist | Qualitative<br><br>Semi-structured<br>questionnaire | United<br>Kingdom | ILD clinics | Unclear |
|------------------------|------------------------|----|---------------------------------------------|---------|-----|---------|----------------------------------------------------------------------------------------------------|-----------------------------------------------------|-------------------|-------------|---------|

HCP: healthcare professional; IC: informal caregiver; PG: patient advocacy group representative; IPF: idiopathic pulmonary fibrosis; NSIP: non-specific interstitial pneumonitis; ILD: interstitial lung disease; HP: hypersensitivity pneumonitis; CTD-ILD: connective tissue disease related interstitial lung disease; CTD-PF: connective tissue disease related pulmonary fibrosis; GAP: Gender-Age-Physiology; TLCO: transfer factor for carbon monoxide; FVC: forced vital capacity; DLCO: diffusing capacity of the lung for carbon monoxide; FEV<sub>1</sub>: forced expiratory volume in 1 s; PR: pulmonary rehabilitation; SF-36: 36-Item Short Form Health Survey; WHOQOL 100: The World Health Organization Quality of Life 100-item questionnaire; GAD-SI: the Generalised Anxiety Disorder-single item questionnaire; SPARC: the Sheffield Profile for Assessment and Referral to Care questionnaire; #: data is presented as mean ± standard deviation (range), median and/or range, whichever available; †: data includes diagnosis, disease severity, disease stage, time of/since diagnosis, or duration of symptoms [mean year ± standard deviation (range)].

**Table S3. Quality assessment of included qualitative studies**

| Study                 | QualSyst criteria for qualitative studies<br>2 = Yes; 1 = Partial; 0 = No |                                          |                                 |                                                                     |                                                         |                                                              |                                                    |                                                               |                                          |                                 | Summary score |
|-----------------------|---------------------------------------------------------------------------|------------------------------------------|---------------------------------|---------------------------------------------------------------------|---------------------------------------------------------|--------------------------------------------------------------|----------------------------------------------------|---------------------------------------------------------------|------------------------------------------|---------------------------------|---------------|
|                       | 1. Question / objective sufficiently described?                           | 2. Study design evident and appropriate? | 3. Context for the study clear? | 4. Connection to a theoretical framework / wider body of knowledge? | 5. Sampling strategy described, relevant and justified? | 6. Data collection methods clearly described and systematic? | 7. Data analysis clearly described and systematic? | 8. Use of verification procedure(s) to establish credibility? | 9. Conclusions supported by the results? | 10. Reflexivity of the account? |               |
| Albright, 2016 (1)    | 2                                                                         | 2                                        | 2                               | 1                                                                   | 1                                                       | 2                                                            | 2                                                  | 2                                                             | 2                                        | 1                               | 85%           |
| Bajwah, 2012 (2)      | 2                                                                         | 2                                        | 2                               | 1                                                                   | 2                                                       | 2                                                            | 2                                                  | 2                                                             | 2                                        | 0                               | 85%           |
| Bajwah, 2013 (3)      | 2                                                                         | 2                                        | 2                               | 1                                                                   | 2                                                       | 2                                                            | 2                                                  | 2                                                             | 2                                        | 2                               | 95%           |
| Belkin, 2014 (4)      | 2                                                                         | 2                                        | 2                               | 1                                                                   | 1                                                       | 1                                                            | 2                                                  | 2                                                             | 2                                        | 1                               | 80%           |
| Bonella, 2016 (6)     | 2                                                                         | 2                                        | 2                               | 0                                                                   | 1                                                       | 2                                                            | 2                                                  | 2                                                             | 2                                        | 0                               | 75%           |
| Bridges, 2014 (7)     | 2                                                                         | 2                                        | 2                               | 1                                                                   | 2                                                       | 2                                                            | 2                                                  | 0                                                             | 2                                        | 0                               | 75%           |
| Burnett, 2019 (8)     | 2                                                                         | 2                                        | 2                               | 2                                                                   | 2                                                       | 2                                                            | 2                                                  | 2                                                             | 2                                        | 1                               | 95%           |
| Conoscenti, 2013 (10) | 2                                                                         | 2                                        | 1                               | 2                                                                   | 0                                                       | 1                                                            | 1                                                  | 0                                                             | 2                                        | 0                               | 55%           |
| Duck, 2015 (12)       | 2                                                                         | 2                                        | 2                               | 2                                                                   | 2                                                       | 2                                                            | 2                                                  | 2                                                             | 2                                        | 0                               | 90%           |

|                          |   |   |   |   |   |   |   |   |   |   |      |
|--------------------------|---|---|---|---|---|---|---|---|---|---|------|
| Gillon, 2016<br>(13)     | 1 | 0 | 0 | 0 | 0 | 1 | 0 | 0 | 0 | 0 | 10%  |
| Giot , 2013<br>(14)      | 2 | 2 | 2 | 1 | 1 | 2 | 2 | 0 | 2 | 0 | 70%  |
| Graney, 2017<br>(15)     | 2 | 2 | 2 | 2 | 1 | 2 | 2 | 2 | 2 | 0 | 85%  |
| Graney, 2017<br>(16)     | 2 | 2 | 2 | 2 | 2 | 2 | 2 | 2 | 2 | 0 | 90%  |
| Holland, 2015<br>(17)    | 2 | 2 | 2 | 2 | 2 | 2 | 2 | 2 | 2 | 0 | 90%  |
| Lindell, 2017<br>(19)    | 2 | 2 | 2 | 1 | 1 | 2 | 2 | 2 | 2 | 1 | 85%  |
| Morisset, 2016<br>(22)   | 2 | 2 | 2 | 2 | 2 | 2 | 2 | 2 | 2 | 1 | 95%  |
| Overgaard, 2016<br>(23)  | 2 | 2 | 2 | 2 | 1 | 2 | 2 | 2 | 2 | 1 | 90%  |
| Pooler, 2018<br>(24)     | 2 | 2 | 2 | 1 | 2 | 2 | 2 | 0 | 2 | 1 | 80%  |
| Ramadurai, 2018<br>(26)  | 2 | 2 | 2 | 1 | 1 | 1 | 2 | 2 | 2 | 0 | 75%  |
| Russell, 2016<br>(27)    | 2 | 2 | 2 | 1 | 2 | 2 | 1 | 0 | 2 | 0 | 70%  |
| Sampson, 2015<br>(28)    | 2 | 2 | 2 | 2 | 2 | 2 | 2 | 2 | 2 | 0 | 90%  |
| Senanayake, 2018<br>(29) | 2 | 2 | 2 | 2 | 2 | 2 | 2 | 2 | 2 | 2 | 100% |
| Schoenheit, 2011<br>(30) | 2 | 2 | 1 | 1 | 1 | 2 | 2 | 2 | 2 | 0 | 75%  |
| Shah, 2018<br>(31)       | 2 | 2 | 2 | 2 | 1 | 2 | 2 | 2 | 2 | 0 | 85%  |
| Swigris, 2005<br>(32)    | 2 | 2 | 2 | 2 | 1 | 2 | 2 | 0 | 2 | 0 | 75%  |
| Wright, 2016<br>(35)     | 2 | 2 | 1 | 1 | 1 | 1 | 1 | 0 | 2 | 0 | 55%  |



**Table S4. Quality assessment of quantitative studies**

| Study             | QualSyst criteria for quantitative studies<br>2 = Yes; 1 = Partial; 0 = No; N/A=not applicable for this study design |                                          |                                                                                                                     |                                                                                          |                                                                            |                                                                                   |                                                                              |                                                                                                                                                   |                             |                                                           |                                                                 |                                 |                                            |                                           | Summary score |
|-------------------|----------------------------------------------------------------------------------------------------------------------|------------------------------------------|---------------------------------------------------------------------------------------------------------------------|------------------------------------------------------------------------------------------|----------------------------------------------------------------------------|-----------------------------------------------------------------------------------|------------------------------------------------------------------------------|---------------------------------------------------------------------------------------------------------------------------------------------------|-----------------------------|-----------------------------------------------------------|-----------------------------------------------------------------|---------------------------------|--------------------------------------------|-------------------------------------------|---------------|
|                   | 1. Question / objective sufficiently described?                                                                      | 2. Study design evident and appropriate? | 3. Method of subject/comparison group selection or source of information/input variables described and appropriate? | 4. Subject (and comparison group, if applicable) characteristics sufficiently described? | 5. If interventional and random allocation was possible, was it described? | 6. If interventional and blinding of investigators was possible, was it reported? | 7. If interventional and blinding of subjects was possible, was it reported? | 8. Outcome and (if applicable) exposure measure(s) well defined and robust to measurement / misclassification bias? Means of assessment reported? | 9. Sample size appropriate? | 10. Analytic methods described/justified and appropriate? | 11. Some estimate of variance is reported for the main results? | 12. Controlled for confounding? | 13. Results reported in sufficient detail? | 14. Conclusions supported by the results? |               |
| Belz, 2018 (5)    | 2                                                                                                                    | 2                                        | 1                                                                                                                   | 2                                                                                        | N/A                                                                        | N/A                                                                               | N/A                                                                          | 1                                                                                                                                                 | 0                           | 1                                                         | 0                                                               | 0                               | 2                                          | 2                                         | 59%           |
| Collard, 2007 (9) | 2                                                                                                                    | 2                                        | 1                                                                                                                   | 2                                                                                        | N/A                                                                        | N/A                                                                               | N/A                                                                          | 2                                                                                                                                                 | 2                           | 2                                                         | N/A                                                             | N/A                             | 2                                          | 2                                         | 94%           |
| Duck, 2015 (11)   | 2                                                                                                                    | 2                                        | 1                                                                                                                   | 0                                                                                        | N/A                                                                        | N/A                                                                               | N/A                                                                          | 2                                                                                                                                                 | 1                           | 1                                                         | 1                                                               | N/A                             | 2                                          | 2                                         | 70%           |
| Killin, 2010 (18) | 2                                                                                                                    | 1                                        | 2                                                                                                                   | 0                                                                                        | N/A                                                                        | N/A                                                                               | N/A                                                                          | 1                                                                                                                                                 | N/A                         | 1                                                         | 0                                                               | N/A                             | 0                                          | 1                                         | 44%           |

|                         |   |   |   |   |     |     |     |   |     |     |     |     |   |   |      |
|-------------------------|---|---|---|---|-----|-----|-----|---|-----|-----|-----|-----|---|---|------|
| Maher, 2018<br>(20)     | 2 | 2 | 2 | 2 | N/A | N/A | N/A | 2 | 2   | 2   | N/A | N/A | 2 | 2 | 100% |
| McLean, 2018<br>(21)    | 2 | 2 | 1 | 1 | N/A | N/A | N/A | 1 | N/A | 1   | N/A | N/A | 2 | 2 | 75%  |
| van Manen, 2017<br>(33) | 2 | 1 | 1 | 1 | N/A | N/A | N/A | 2 | N/A | N/A | N/A | N/A | 2 | 2 | 79%  |
| Ramadurai, 2019<br>(25) | 2 | 2 | 2 | 1 | N/A | N/A | N/A | 2 | N/A | 2   | N/A | N/A | 2 | 2 | 94%  |
| Wall, 2013<br>(34)      | 2 | 2 | 1 | 1 | N/A | N/A | N/A | 2 | N/A | N/A | N/A | N/A | 2 | 2 | 86%  |

## References

1. Albright K, Walker T, Baird S, Eres L, Farnsworth T, Fier K, et al. Seeking and sharing: why the pulmonary fibrosis community engages the web 2.0 environment. *BMC polm*. 2016;16(4):DOI 10.1186/s12890-016-0167-7.
2. Bajwah S, Koffman J, Higginson IJ, Ross JR, Wells AU, Birring SS, et al. 'I wish I knew more ...' the end-of-life planning and information needs for end-stage fibrotic interstitial lung disease: views of patients, carers and health professionals. *BMJ Supportive & Palliative Care*. 2013;3(1):84-90.
3. Bajwah S, Higginson IJ, Ross JR, Wells AU, Birring SS, Riley J, et al. The palliative care needs for fibrotic interstitial lung disease: a qualitative study of patients, informal caregivers and health professionals. *Palliative Medicine*. 2013;27(9):869-76.
4. Belkin A, Albright K, Swigris JJ. A qualitative study of informal caregivers' perspectives on the effects of idiopathic pulmonary fibrosis. *BMJ Open Respiratory Research*. 2014;1:e000007: DOI 10.1136/bmjresp-2013-.
5. Belz A, Debowska P, Warzecha J, Gasiorek A, Galczynska D, Czyz S, et al. Patients' expectations and quality of life before introduction of pirfenidone used in idiopathic pulmonary fibrosis. *European Respiratory Journal Conference: European Respiratory Society International Congress*. 2018;52(Supplement 62):PA4784.
6. Bonella F, Wijsenbeek M, Molina-Molina M, Duck A, Mele R, Geissler K, et al. European IPF Patient Charter: unmet needs and a call to action for healthcare policymakers. *European Respiratory Journal*. 2016;47(2):597-606.
7. Bridges JFP, Paly VF, Barker E, Kervitsky D. Identifying the benefits and risks of emerging treatments for idiopathic pulmonary fibrosis: a qualitative study. *Patient*. 2014;8(1):85-92.
8. Burnett K, Glaspole I, Holland AE. Understanding the patient's experience of care in idiopathic pulmonary fibrosis. *Respirology*. 2019;24(3):270-7.
9. Collard HR, Tino G, Noble PW, Shreve MA, Michaels M, Carlson B, et al. Patient experiences with pulmonary fibrosis. *Respir Med*. 2007;101(6):1350-4.
10. Conoscenti CS, Rubin EM, Sapiro N. Patient journey with idiopathic pulmonary fibrosis (IPF): A breathtaking experience. *American Journal of Respiratory and Critical Care Medicine Conference: American Thoracic Society International Conference*. 2013;187:A1090.
11. Duck A, Pigram L, Errhalt P, Ahmed D, Chaudhuri N. IPF Care: a support program for patients with idiopathic pulmonary fibrosis treated with pirfenidone in Europe. *Adv Ther*. 2015a;32(2):87-107.
12. Duck A, Spencer LG, Bailey S, Leonard C, Ormes J, Caress AL. Perceptions, experiences and needs of patients with idiopathic pulmonary fibrosis. *J Adv Nurs*. 2015b;71(5):1055-65.
13. Gillon S, Sutherland T, Slough J. Improving palliative care for patients with idiopathic pulmonary fibrosis. *Palliative Medicine*. 2016;30(4):S99.
14. Giot C, Maronati M, Becattelli I, Schoenheit G. Idiopathic pulmonary fibrosis: an EU patient perspective survey. *Current Respiratory Medicine Reviews*. 2013;9(2):112-9.
15. Graney BA, Wamboldt FS, Baird S, Churney T, Fier K, Korn M, et al. Informal caregivers experience of supplemental oxygen in pulmonary fibrosis. *Health Qual Life Outcomes*. 2017;15(133):DOI 10.1186/s12955-017-0710-0.
16. Graney BA, Wamboldt FS, Baird S, Churney T, Fier K, Korn M, et al. Looking ahead and behind at supplemental oxygen: a qualitative study of patients with pulmonary fibrosis. *Heart Lung*. 2017;46(5):387-93.

17. Holland AE, Fiore JF, Jr., Goh N, Symons K, Dowman L, Westall G, et al. Be honest and help me prepare for the future: what people with interstitial lung disease want from education in pulmonary rehabilitation. *Chronic Respiratory Disease*. 2015;12(2):93-101.
18. Killin CR, Hayes J, Byrne A, Hope-Gill B. Quality of care for patients with idiopathic pulmonary fibrosis-perspectives from patients and carers. *Palliative Medicine*. 2010;1:S178-S9.
19. Lindell KO, Kavalieratos D, Gibson KF, Tycon L, Rosenzweig M. The palliative care needs of patients with idiopathic pulmonary fibrosis: a qualitative study of patients and family caregivers. *Heart Lung*. 2017;46(1):24-9.
20. Maher Toby m, Swigris Jeffrey j, Kreuter M, Wijssenbeek M, Cassidy N, Ireland L, et al. Identifying barriers to idiopathic pulmonary fibrosis treatment: a survey of patient and physician views. *Respiration*. 2018;96(6):514-24.
21. McLean A, Webster S, Fry M, Lau E, Corte P, Torzillo P, et al. Priorities and expectations of patients attending a multidisciplinary interstitial lung disease clinic. *Respirology*. 2018;23 (Supplement 1):146.
22. Morisset J, Dubé B-P, Garvey C, Bourbeau J, Collard HR, Swigris JJ, et al. The unmet educational needs of patients with interstitial lung disease. Setting the stage for tailored pulmonary rehabilitation. *Annals of the American Thoracic Society*. 2016;13(7):1026-33.
23. Overgaard D, Kaldan G, Marsaa K, Nielsen TL, Shaker SB, Egerod I. The lived experience with idiopathic pulmonary fibrosis: a qualitative study. *European Respiratory Journal*. 2016;47(5):1472-80.
24. Pooler C, Richman-Eisenstat J, Kalluri M. Early integrated palliative approach for idiopathic pulmonary fibrosis: A narrative study of bereaved caregivers' experiences. *Palliative Medicine*. 2018;32(9):1455-64.
25. Ramadurai D, Corder S, Churney T, Graney B, Harshman A, Meadows S, et al. Idiopathic pulmonary fibrosis: educational needs of health-care providers, patients, and caregivers. *Chronic Respiratory Disease*. 2019;16:1-8.
26. Ramadurai D, Corder S, Churney T, Graney B, Harshman A, Meadows S, et al. Understanding the informational needs of patients with IPF and their caregivers: 'You get diagnosed, and you ask this question right away, what does this mean?'. *BMJ Open Quality*. 2018;7:e000207: DOI 10.1136/bmjopen-2017-000207.
27. Russell AM, Ripamonti E, Vancheri C. Qualitative European survey of patients with idiopathic pulmonary fibrosis: patients' perspectives of the disease and treatment. *BMC pulm*. 2016;16(10):DOI 10.1186/s12890-016-0171-y.
28. Sampson C, Gill BH, Harrison NK, Nelson A, Byrne A. The care needs of patients with idiopathic pulmonary fibrosis and their carers (CaNoPy): results of a qualitative study. *BMC pulm*. 2015;15(155):DOI 10.1186/s12890-015-0145-5.
29. Senanayake S, Harrison K, Lewis M, McNarry M, Hudson J. Patients' experiences of coping with idiopathic pulmonary fibrosis and their recommendations for its clinical management. *PLoS ONE*. 2018;13(5):e0197660: DOI 10.1371/journal.pone.0197660.
30. Schoenheit G, Becattelli I, Cohen AH. Living with idiopathic pulmonary fibrosis: an in-depth qualitative survey of European patients. *Chronic Respiratory Disease*. 2011;8(4):225-31.
31. Shah RJ, Collard HR, Morisset J. Burden, resilience and coping in caregivers of patients with interstitial lung disease. *Heart Lung*. 2018;47(3):264-8.
32. Swigris JJ, Stewart AL, Gould MK, Wilson SR. Patients' perspectives on how idiopathic pulmonary fibrosis affects the quality of their lives. *Health Qual Life Outcomes*. 2005;3(61):DOI 10.1186/477-7525-3-61.

33. van Manen MJG, Kreuter M, van den Blink B, Oltmanns U, Palmowski K, Brunnemer E, et al. What patients with pulmonary fibrosis and their partners think: A live, educative survey in the Netherlands and Germany. *ERJ Open Research*. 2017;3:00065-2016: DOI 10.1183/23120541.00065-2016.
34. Wall J, Crosby V, Hussain A, Wilcock A, Saini G, Braybrooke R, et al. Establishing the palliative and supportive care needs of patients with idiopathic pulmonary fibrosis and non specific interstitial pneumonia. *Thorax*. 2013;68:A165-A6.
35. Wright J, Cove J, Anne-Marie R, Kokosi M, Mak VFY, Felix C, et al. Pilot study to test the feasibility of introducing palliative care as part of a psychological support workshop for patients newly diagnosed with idiopathic pulmonary fibrosis (IPF) and their families. *Palliative Medicine*. 2016;30(6):NP230.
